# Supplementary material for: Cost-Effectiveness Analysis of CAR T-Cell Therapies vs Antibody Drug Conjugates for Patients with Advanced Multiple Myeloma
Source: PubMed Central journal article supplement — Cancer Control. 2023 Jan 18;30:10732748221142945. doi: 10.1177/10732748221142945 (PMC9869188; doi:10.1177/10732748221142945), 2023-01-18
Supplement: sj-pdf-1-ccx-10.1177_10732748221142945.pdf [file sj-pdf-1-ccx-10.1177_10732748221142945.pdf]

Supplement: Cost-Effectiveness Analysis of CAR T-Cell Therapies vs. Antibody Drug Conjugates for Patients with Advanced Multiple Myeloma.

**Authors:**

## Model Details

Our Markov model draws on trial data randomly sampling from the PFS and OS curves to generate both a duration in treatment and survival estimates at the patient-level ensuring our population-level curves matched the trials. We define responsiveness to treatment based on the PFS months from the trials. Simulated patients who become “unresponsive,” according to their initial category, are moved to the progressive disease state. Figure x shows an overview of the model for patients simulated to received one of the CART therapies and xx shows for patients simulated to receive belamaf.

## Supplemental Figure 1. Overview of CAR-T Therapy Model

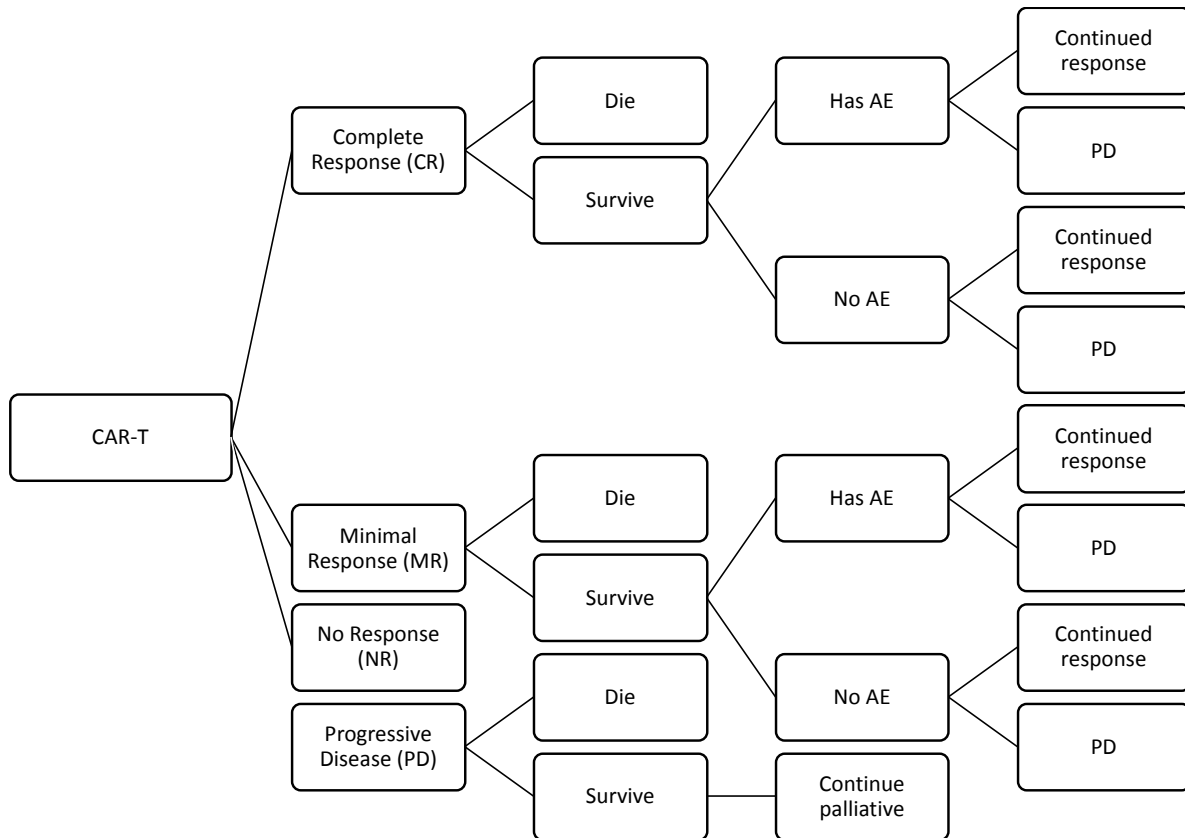

Notes: NR patients move to PD in the next cycle. For ease of presentation, we have collapsed adverse events (AE) into one category, but in the model, we break out patients simulated to have cytokine release syndrome (CRS) and neurotoxicities separately from all other Grade 3 or 4 AEs.

## Supplemental Figure 2. Overview of Belamaf Model

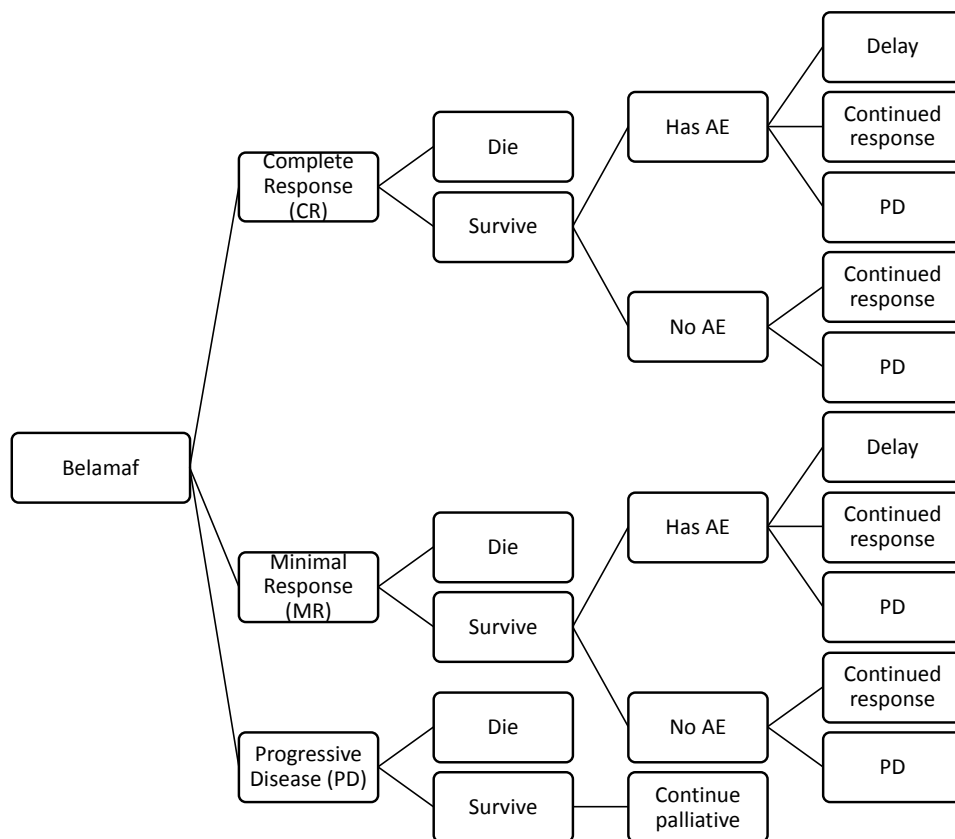

Notes: NR patients move to PD in the next cycle (not shown here, but included). In this arm, patients with an adverse event could pause treatment for a cycle.

## Cost Details

In the tables below, we provide the details of the per cycle or per treatment costs for the 3 arms. We converted monthly costs for treating Grade 3 or 4 severe adverse events from a previous study.<sup>14</sup> However, for the costs of treating cytokine release syndrome and neurotoxicities we relied on a small study which reported hospitalization and treatment costs for 3 patients, who had an median treatment cost of \$80,904.<sup>16,23</sup>

| Belamaf                                         | Costs (in 2020\$) | % of Treated that Incur |
|-------------------------------------------------|-------------------|-------------------------|
| Drug and Administration (per cycle)             | \$23,900          |                         |
| Severe adverse events (per case with severe AE) | \$1,841           |                         |
| Monthly costs among those with:                 |                   |                         |
| Pneumonia                                       | \$16,489          | 6%                      |
| Asthenia/fatigue                                | \$9,365           | 2%                      |
| Hypocalcemia                                    | \$1,282           | 21%                     |
| Lymphopenia                                     | \$184             | 13%                     |
| Neutropenia                                     | \$184             | 11%                     |
| Thrombocytopenia                                | \$184             | 22%                     |

|                          |        |     |
|--------------------------|--------|-----|
| Hypercalcemia            | \$184  | 7%  |
| Keratopy, blurred vision | \$1868 | 17% |

### Ide-cel

|                                                 |           |                   |
|-------------------------------------------------|-----------|-------------------|
| Drug and Administration (per patient)           | \$442,705 |                   |
| Lymphodepleting chemotherapy                    | \$12,981  |                   |
|                                                 |           | % of Treated that |
| Severe adverse events (per case with severe AE) |           | Incur             |
| Cytokine Release Syndrome (CRS) /NE             | \$80,904  | 0.08              |
| Without CRS/NE, monthly costs among those with: |           |                   |
| Febrile neutropenia                             | \$14,720  | 16%               |
| Diarrhea                                        | \$10,809  | 2%                |
| Asthenia/fatigue                                | \$9,365   | 2%                |
| Hypocalcemia                                    | \$1,282   | 8%                |
| Anemia                                          | \$1,078   | 60%               |
| Hyponatremia                                    | \$184     | 5%                |
| Hypophosphatemia                                | \$184     | 16%               |
| Leukopenia                                      | \$184     | 39%               |
| Lymphopenia                                     | \$184     | 27%               |
| Neutropenia                                     | \$184     | 89%               |
| Thrombocytopenia                                | \$184     | 52%               |

### Cilta-cel

|                                                 |           |                   |
|-------------------------------------------------|-----------|-------------------|
| Drug and Administration (per patient)           | \$465,000 |                   |
| Lymphodepleting chemotherapy                    | \$12,981  |                   |
|                                                 |           | % of Treated that |
| Severe adverse events (per case with severe AE) |           | Incur             |
| Cytokine Release Syndrome (CRS) /NE             | \$80,904  | 0.13              |
| Without CRS/NE, monthly costs among those with: |           |                   |
| Nausea                                          | \$13,247  | 1%                |
| Diarrhea                                        | \$10,809  | 1%                |
| Asthenia/fatigue                                | \$9,365   | 5%                |
| Hypocalcemia                                    | \$1,282   | 3%                |
| Anemia                                          | \$1,078   | 68%               |
| Hyponatremia                                    | \$184     | 4%                |
| Hypophosphatemia                                | \$184     | 7%                |
| Leukopenia                                      | \$184     | 61%               |
| Lymphopenia                                     | \$184     | 50%               |
| Neutropenia                                     | \$184     | 95%               |
| Thrombocytopenia                                | \$184     | 60%               |
